# Supplementary material for: Synthesis, Structure and Antifungal Activity of New 3-[(5-Aryl-1,3,4-oxadiazol-2-yl)methyl]benzo[d]thiazol-2(3H)-ones
Source: Molecules. 2012 Jan 18;17(1):989–1001. doi: 10.3390/molecules17010989 (PMC6268515; doi:10.3390/molecules17010989)

**Supplementary**

**13C-NMR spectra of 4a ~ v**

13C-NMR spectra of 4a: C16H11N3O2S


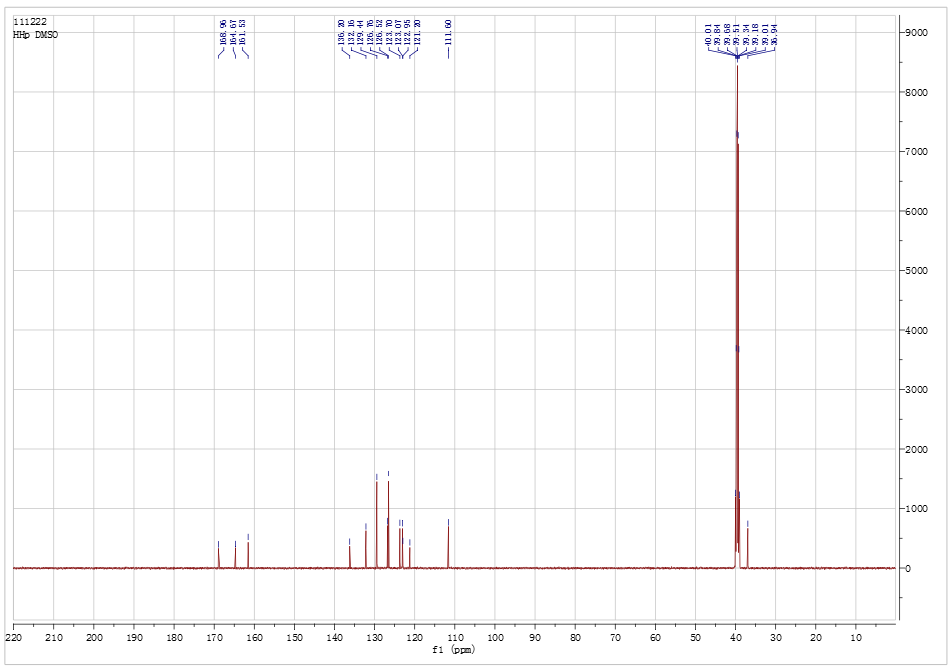


13C-NMR spectra of 4b: C17H13N3O2S


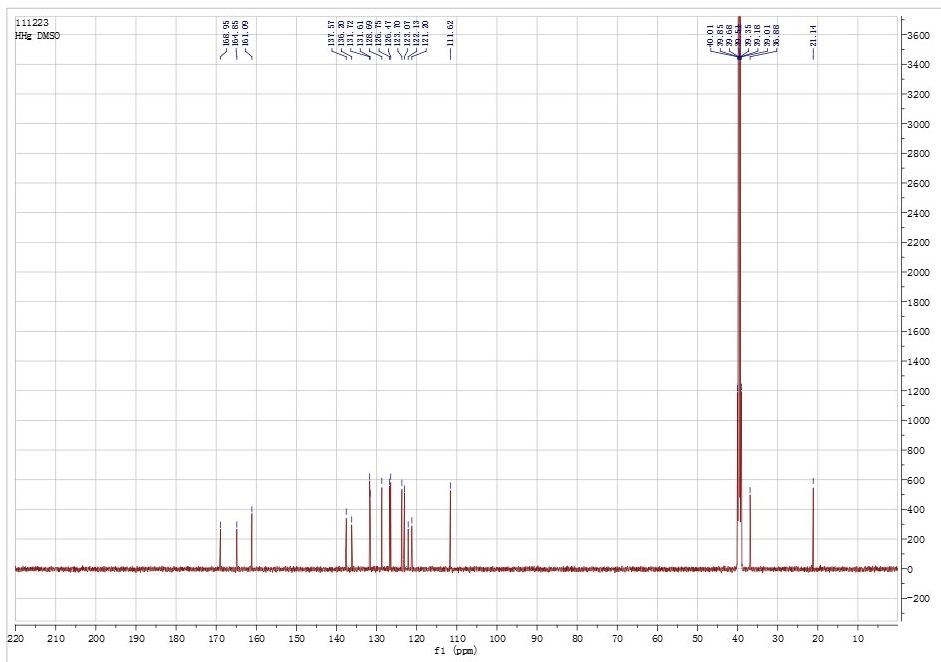


13C-NMR spectra of 4c: C17H13N3O2S


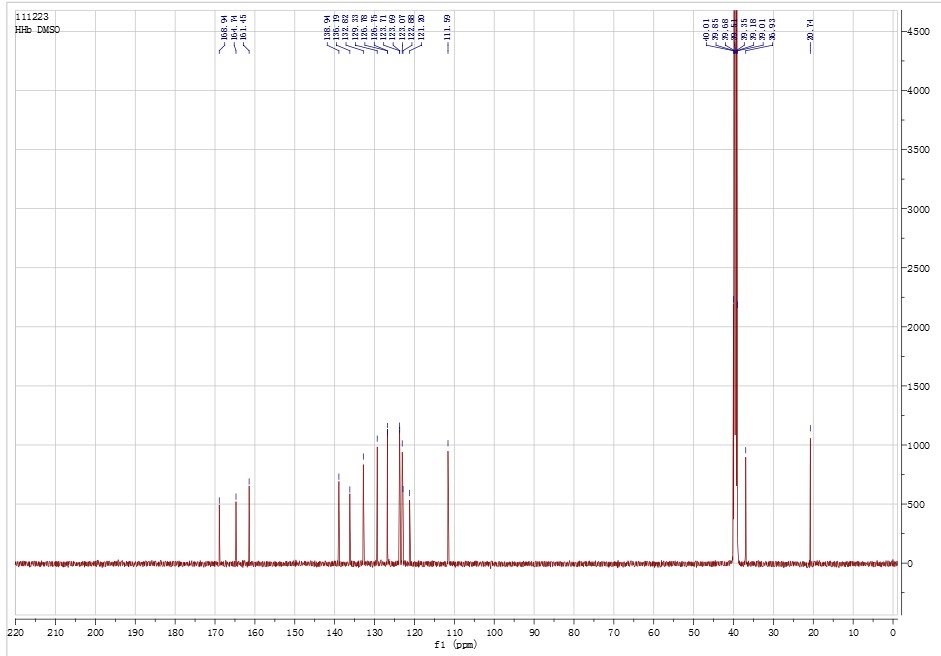


13C-NMR spectra of 4d: C17H13N3O2S


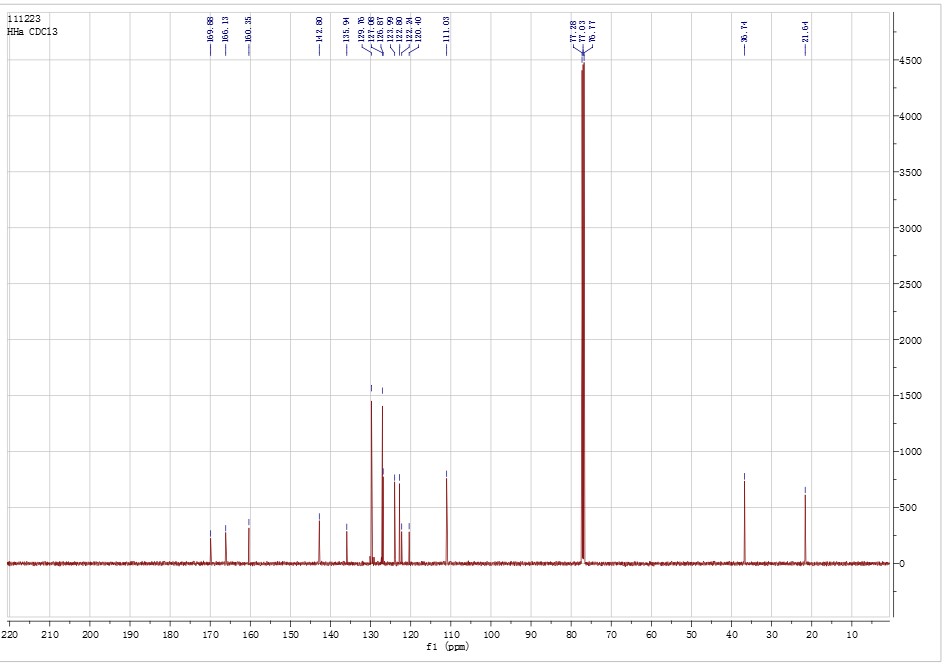


13C-NMR spectra of 4e: C19H17N3O2S


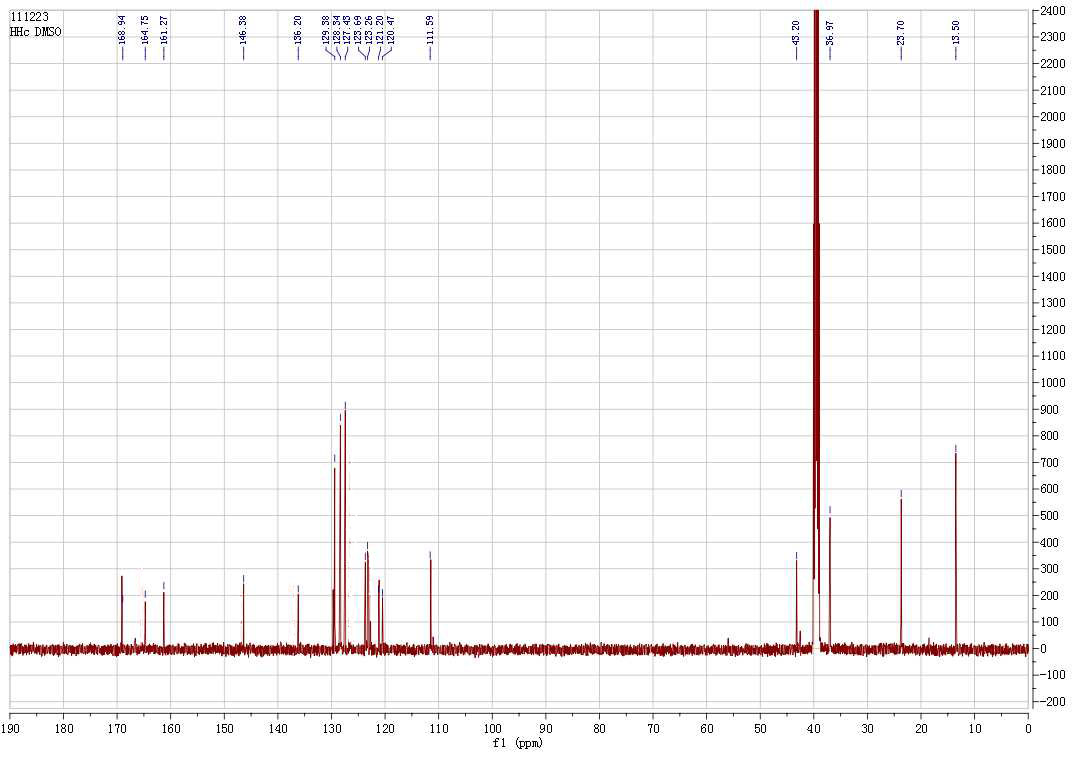


13C-NMR spectra of 4f: C19H17N3O2S


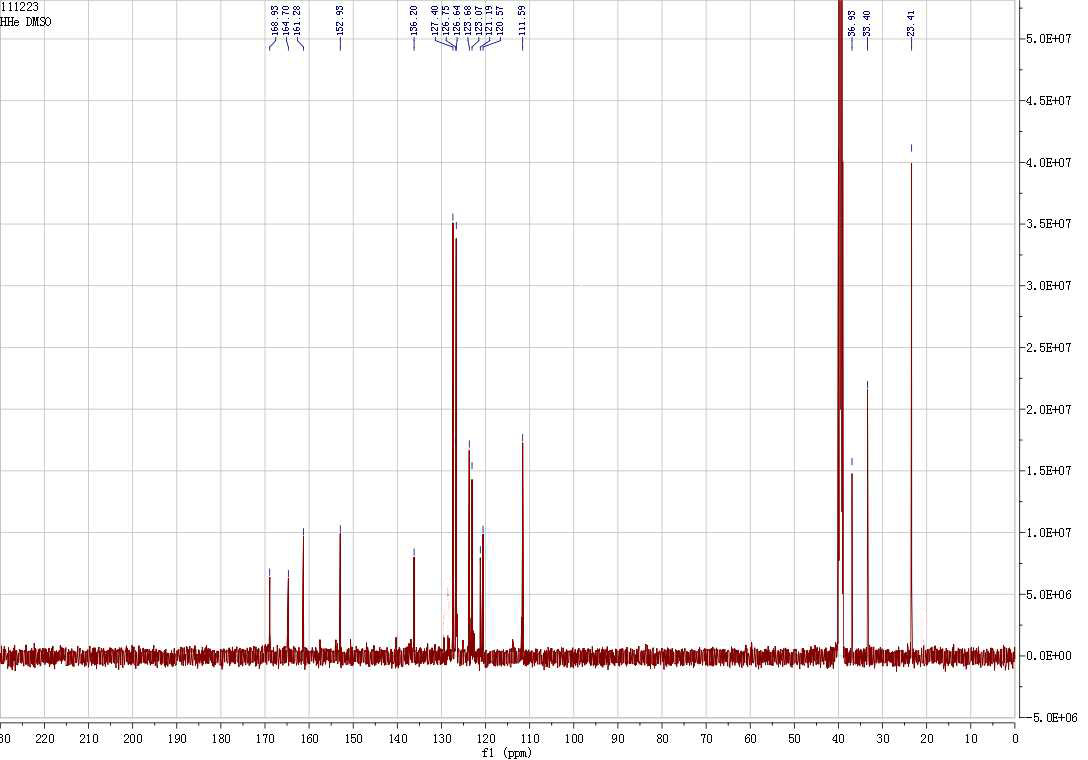


13C-NMR spectra of 4g: C20H19N3O2S


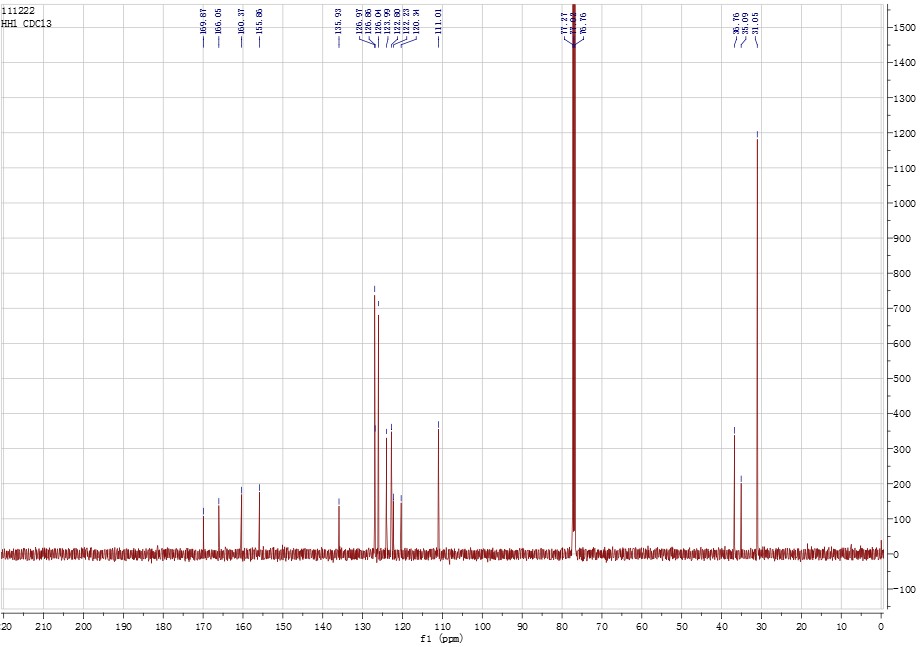


13C-NMR spectra of 4h: C21H21N3O2S


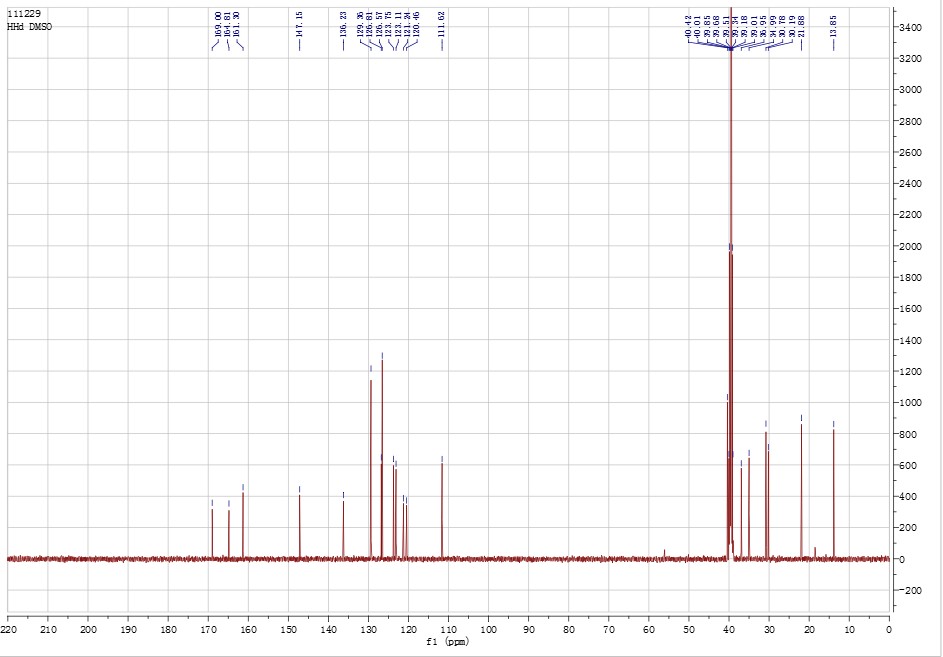


13C-NMR spectra of 4i: C16H10ClN3O2S


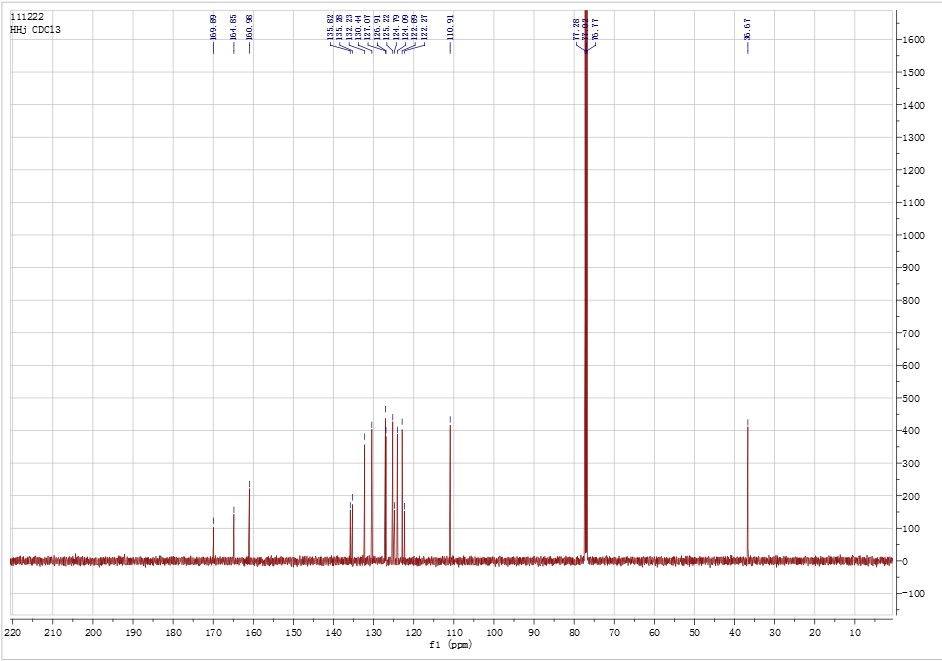


13C-NMR spectra of 4j: C16H9Cl2N3O2S


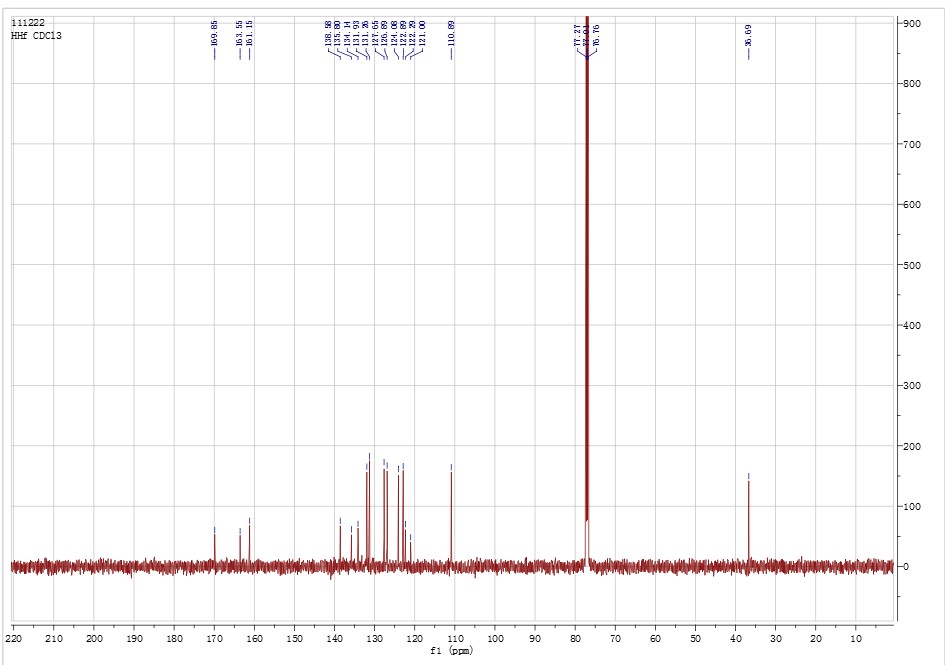


13C-NMR spectra of 4k: C16H10FN3O2S


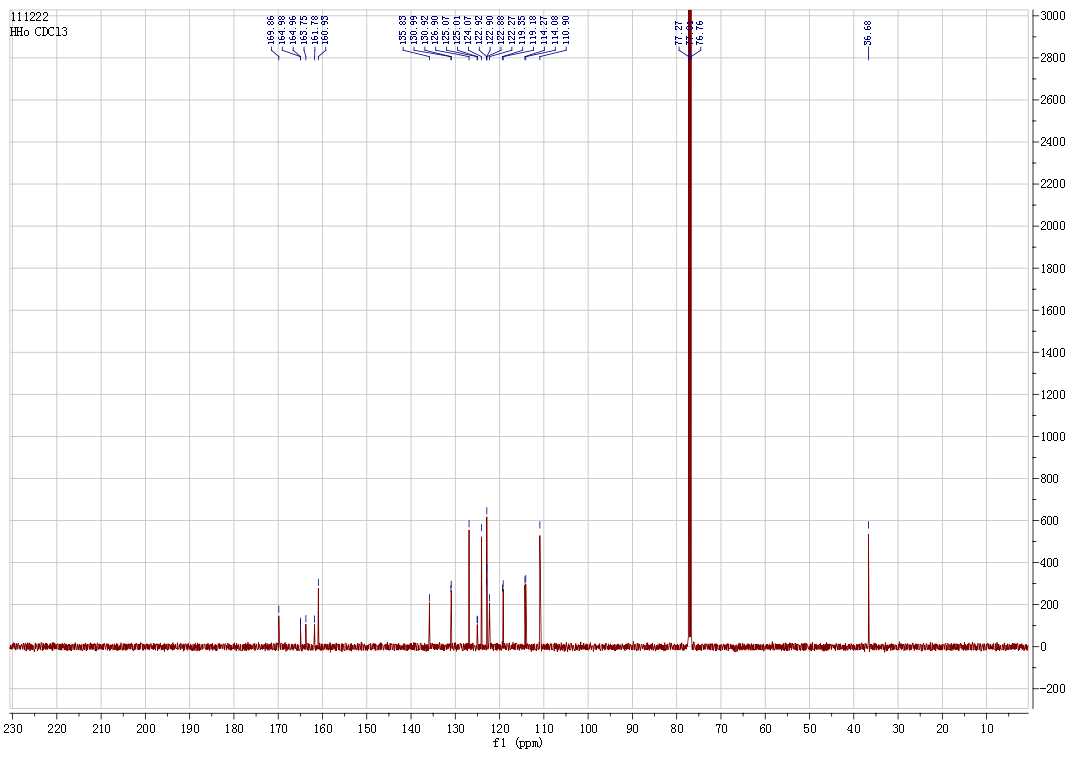


13C-NMR spectra of 4l: C16H10FN3O2S


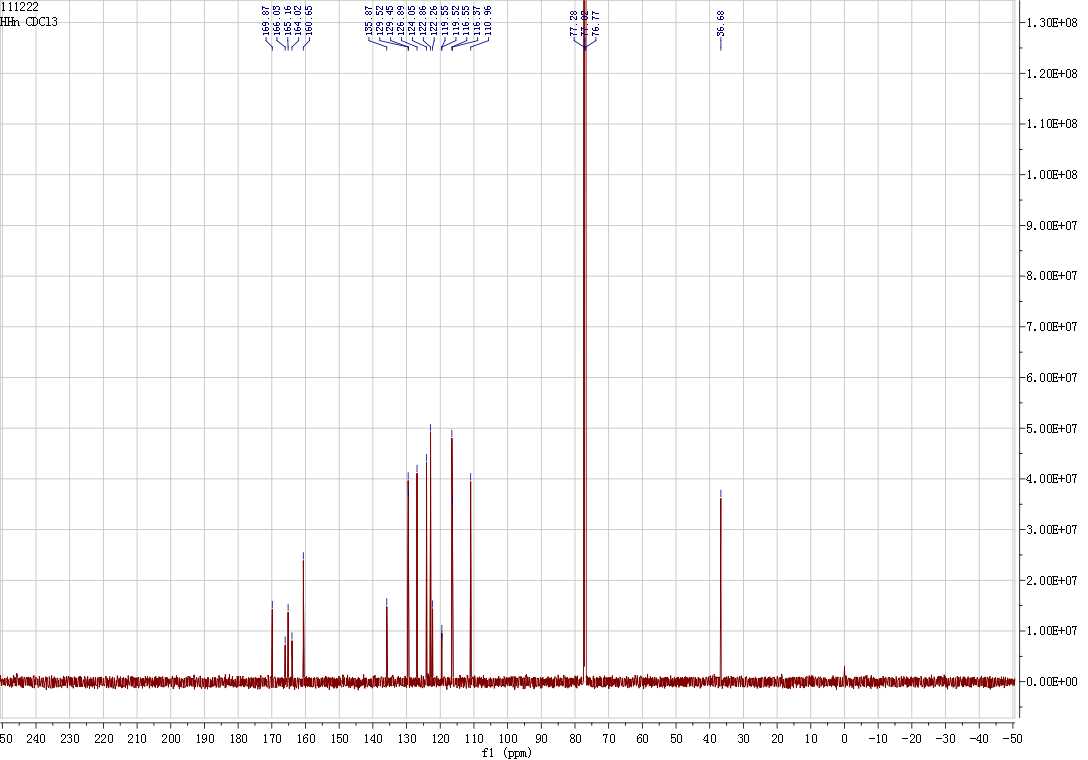


13C-NMR spectra of 4m: C17H13N3O3S


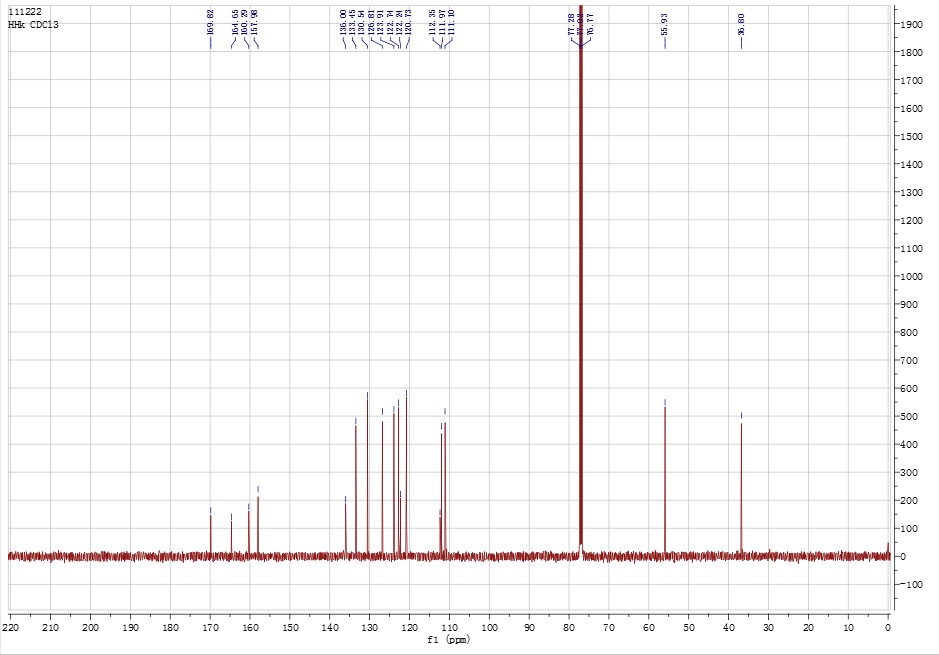


13C-NMR spectra of 4n: C17H13N3O3S


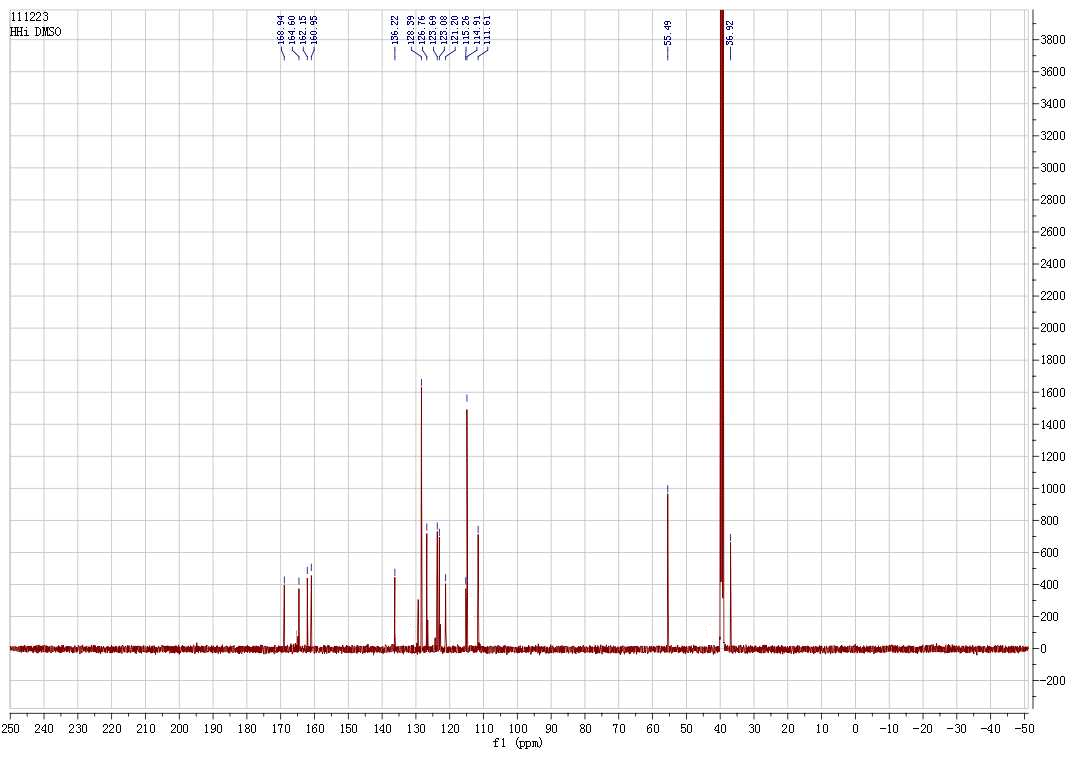


13C-NMR spectra of 4o: C16H10N4O4S


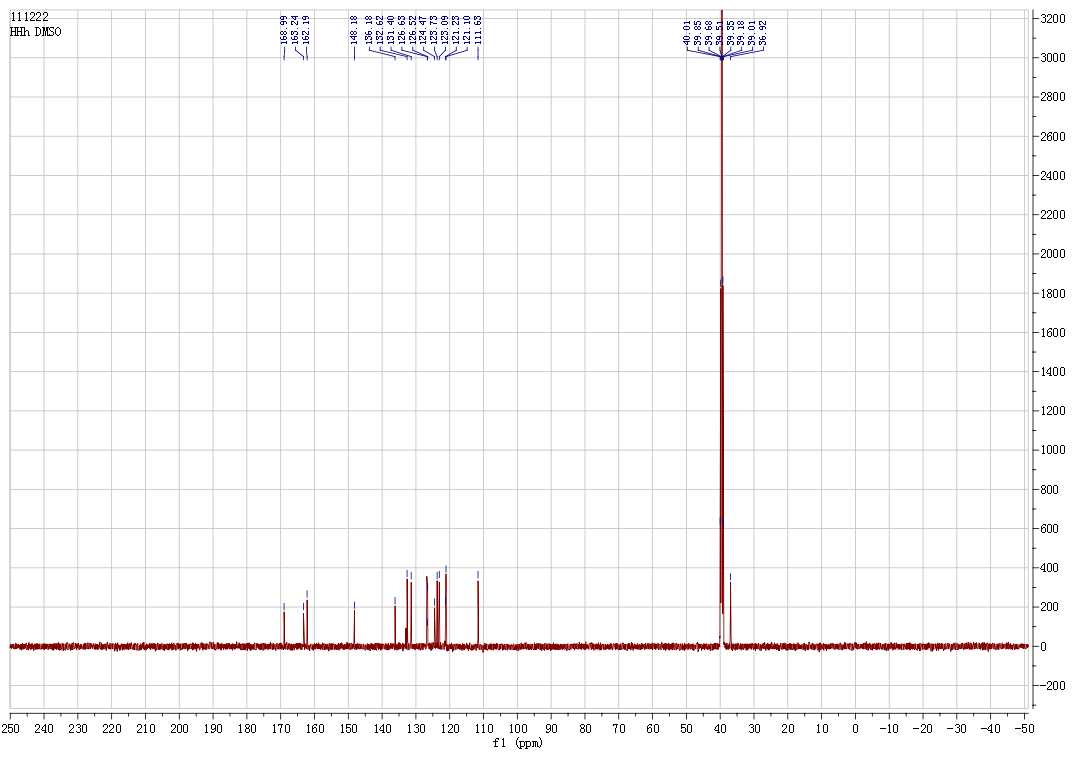


13C-NMR spectra of 4p: C15H9ClN4O2S


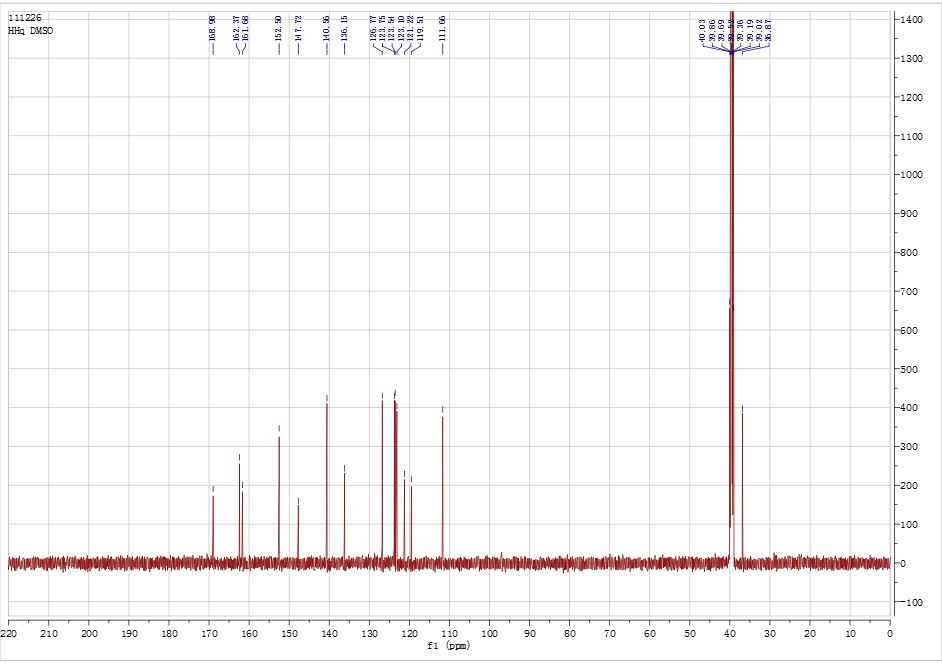


13C-NMR spectra of 4q: C16H10ClN3O2S


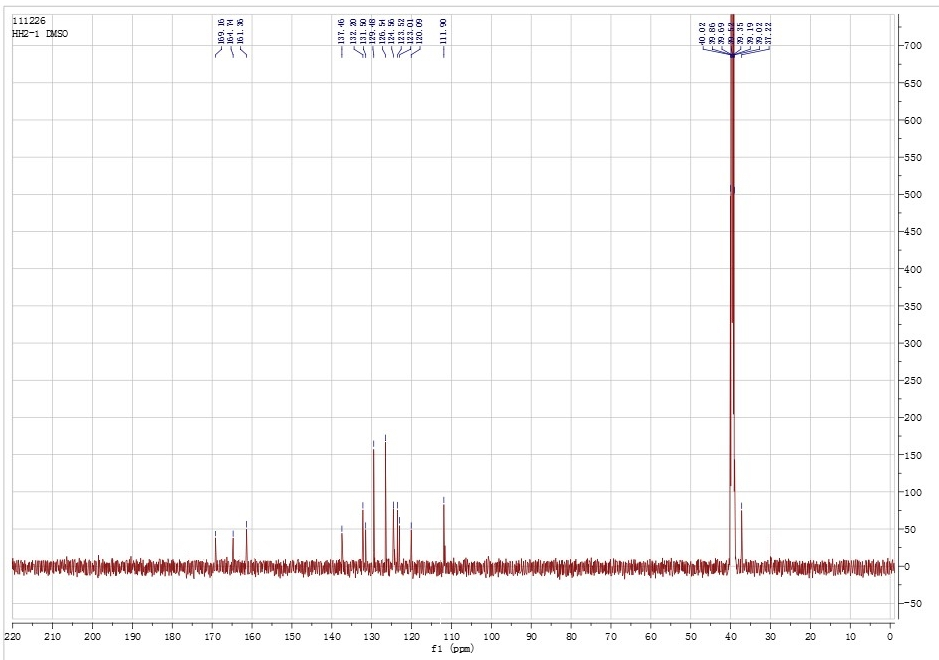


13C-NMR spectra of 4r: C17H12ClN3O2S


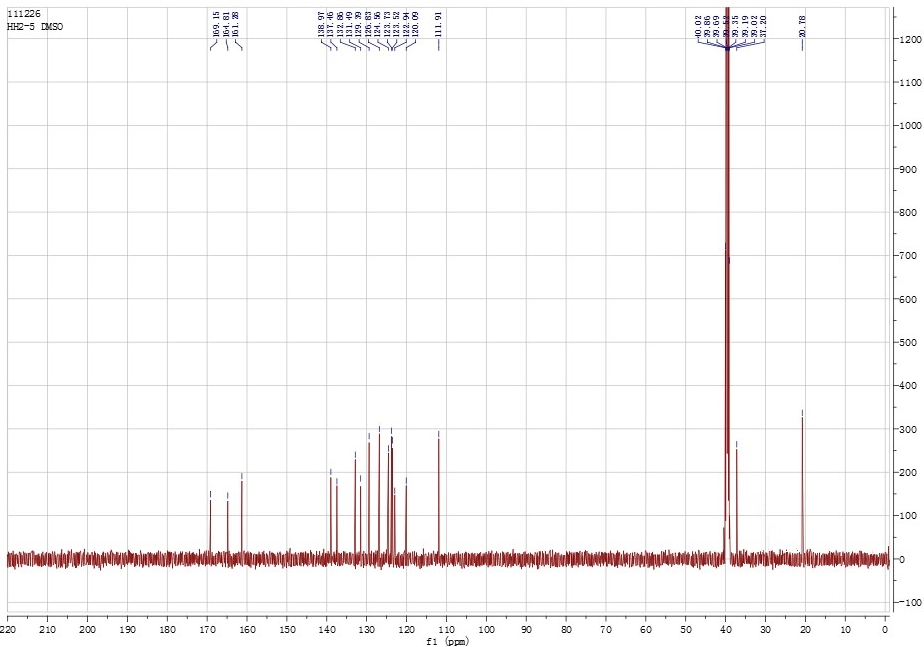


13C-NMR spectra of 4s: C17H12ClN3O2S


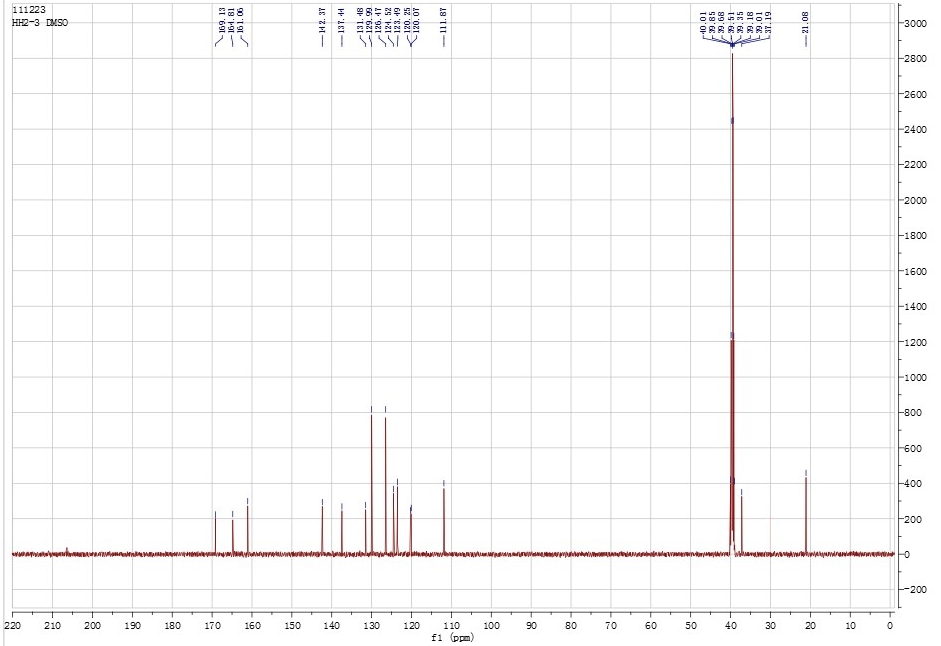


13C-NMR spectra of 4t: C20H18ClN3O2S


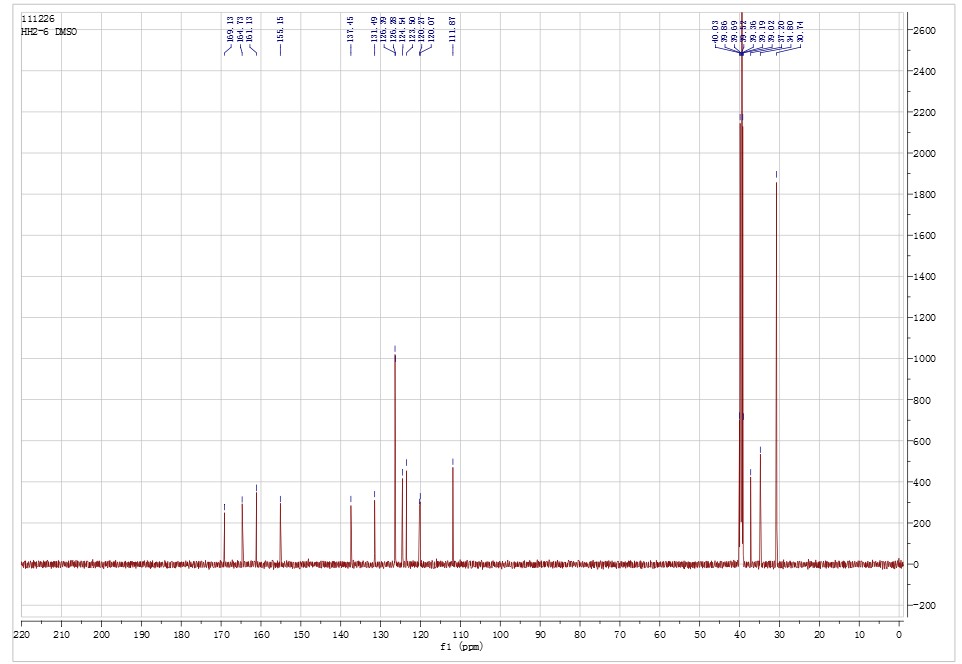


13C-NMR spectra of 4u: C17H12ClN3O3S


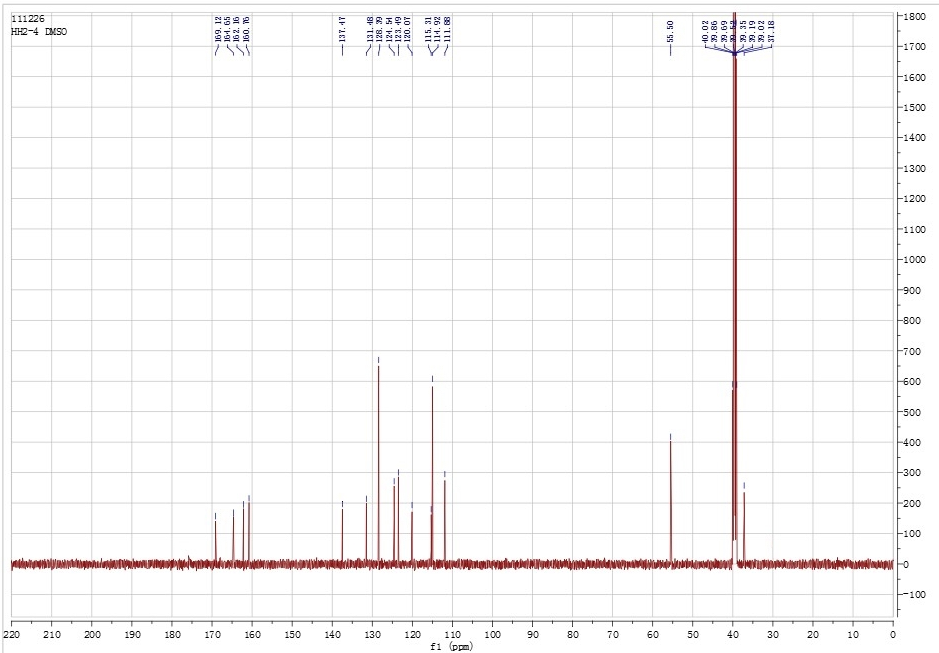


13C-NMR spectra of 4v: C15H8Cl2N4O2S


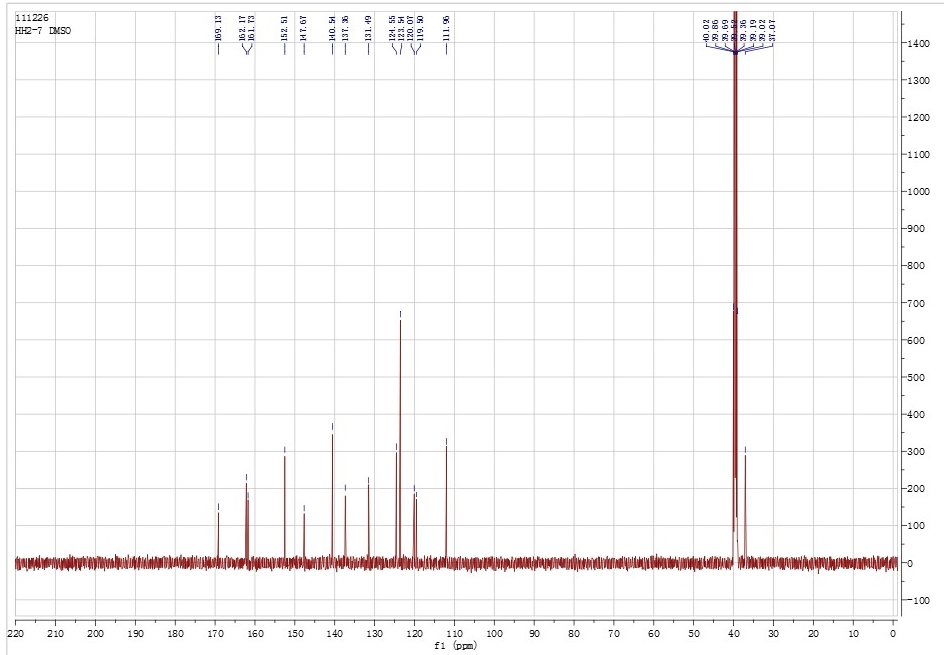

Supplement: Supplementary file 1 [file molecules-17-00989-s001.doc]
